# Supplementary material for: PEGylated amphiphilic polymeric manganese(ii) complexes as magnetic resonance angiographic agents
Source: Royal Society of Chemistry journal article supplement (doi:10.1039/d2tb00089j), 2022-01-01
Supplement: d2tb00089j1.pdf [file d2tb00089j1.pdf]

# PEGylated amphiphilic polymeric manganese(II) complex as magnetic resonance angiographic agent

*Xiaoqin Liu,<sup>‡a</sup> Shengxiang Fu,<sup>‡a</sup> Chunchao Xia,<sup>‡b</sup> Mengye Li,<sup>a</sup> Zhongyuan Cai,<sup>a</sup> Changqiang Wu,<sup>c</sup> Fuling Lu,<sup>c</sup> Jiang Zhu,<sup>c</sup> Bin, Song,<sup>d</sup> Qiyong Gong,<sup>ef</sup> Hua Ai<sup>\*ab</sup>*

<sup>a</sup>National Engineering Research Center for Biomaterials, Sichuan University, Chengdu 610064, P. R. China.

<sup>b</sup>Department of Radiology, West China Hospital, Sichuan University, Chengdu 610041, P. R. China.

<sup>c</sup>Sichuan Key Laboratory of Medical Imaging, School of Medical Imaging, North Sichuan Medical College, Nanchong 637000, P. R. China.

<sup>d</sup>Huaxi MR Research Center (HMRRC), Department of Radiology, West China Hospital of Sichuan University, Chengdu, China.

<sup>e</sup>Psychoradiology Research Unit of Chinese Academy of Medical Sciences, Sichuan University, Chengdu, China.

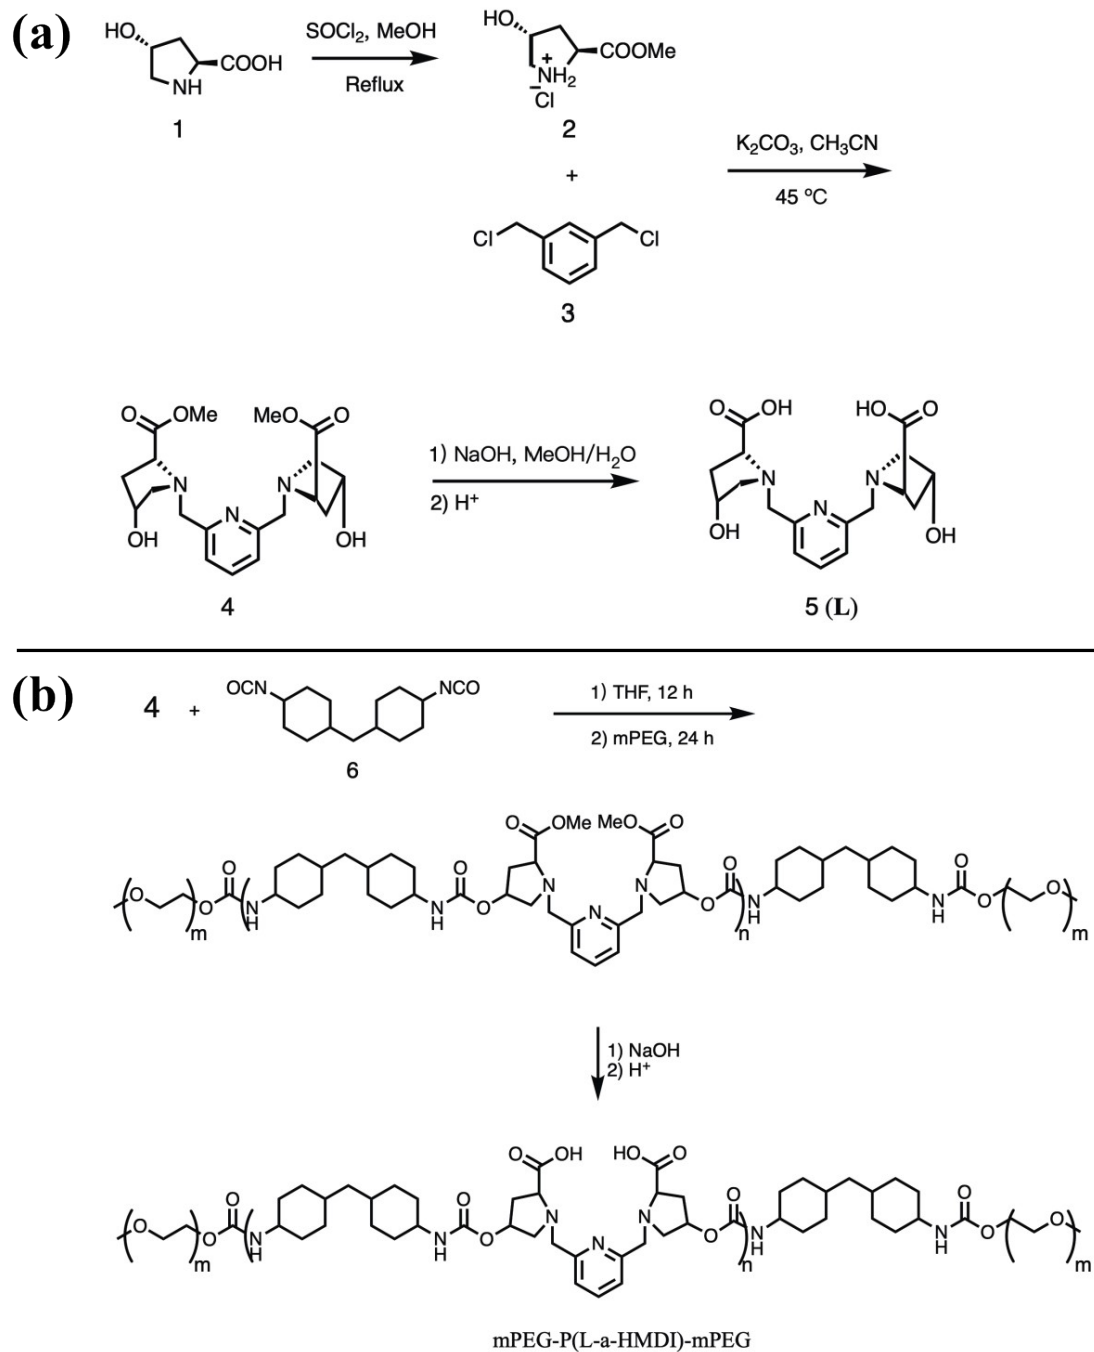

**Scheme S1.** Synthesis of the small molecule ligand **L** (a) and mPEG-P(L-a-HMDI)-mPEG (b).

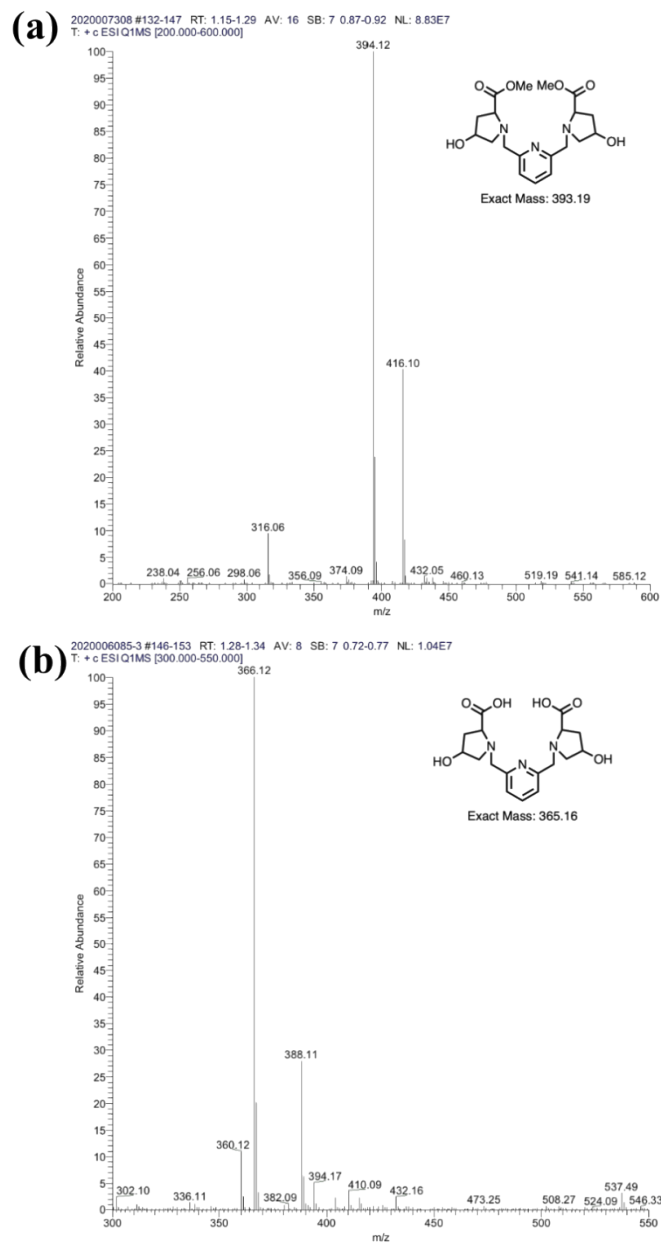

**Figure S1.** Electrospray ionization mass spectrometry (ESI-MS) spectrum of compound 4 (a) and L (b).

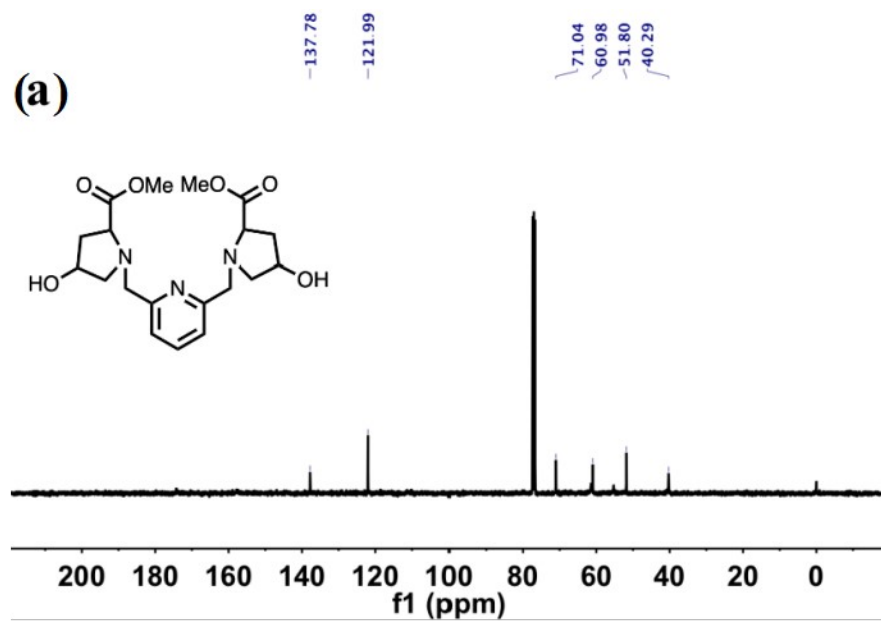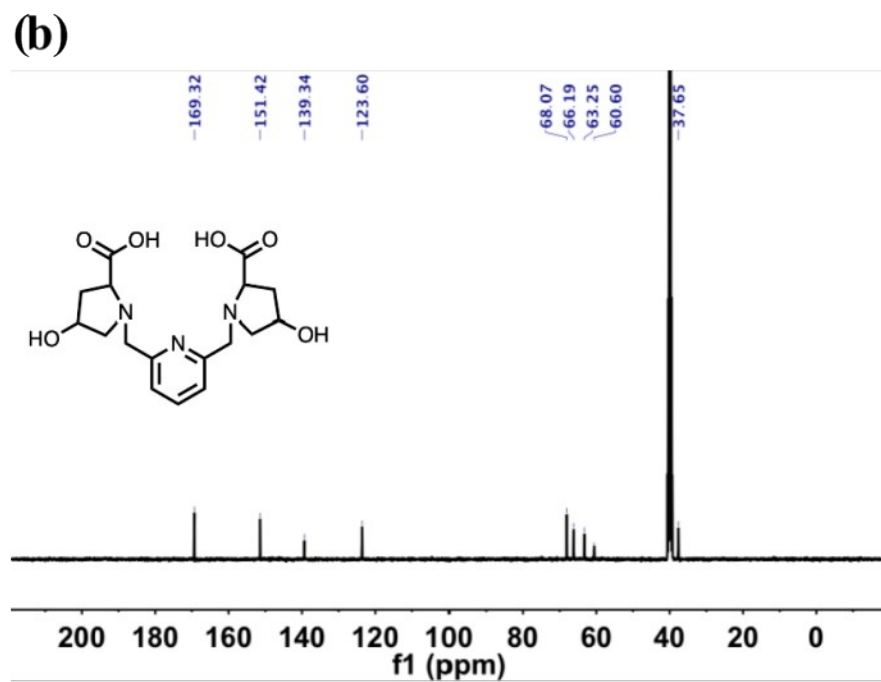

Figure S2.  $^{13}\text{C}$  NMR spectrum of compound 4 (a) and L (b).

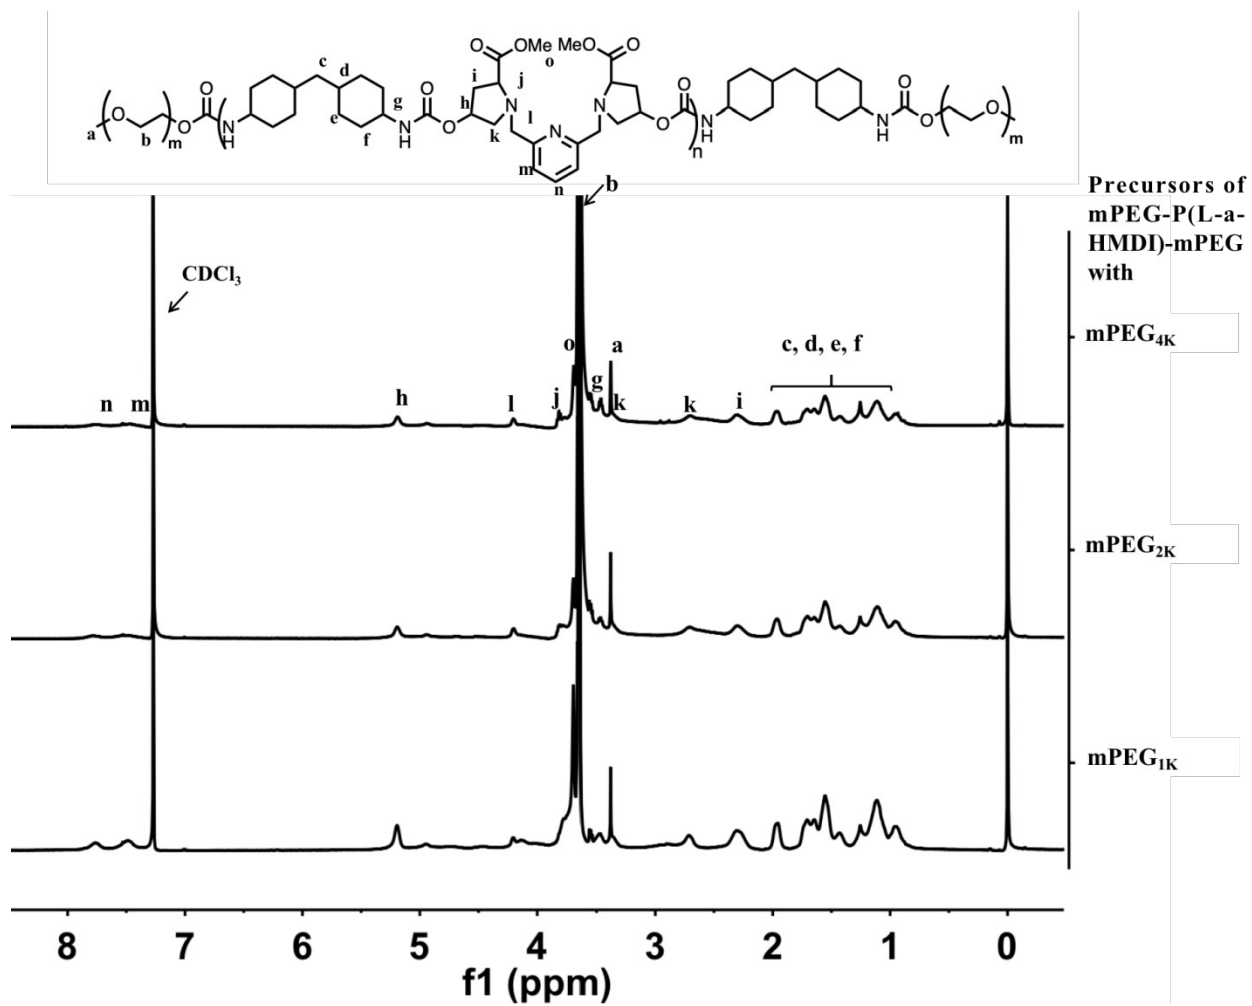

**Figure S3.** <sup>1</sup>H NMR spectrum of the precursors of mPEG-P(L-a-HMDI)-mPEG with different molecular weight of mPEG (1 kD, 2 kD and 4 kD).

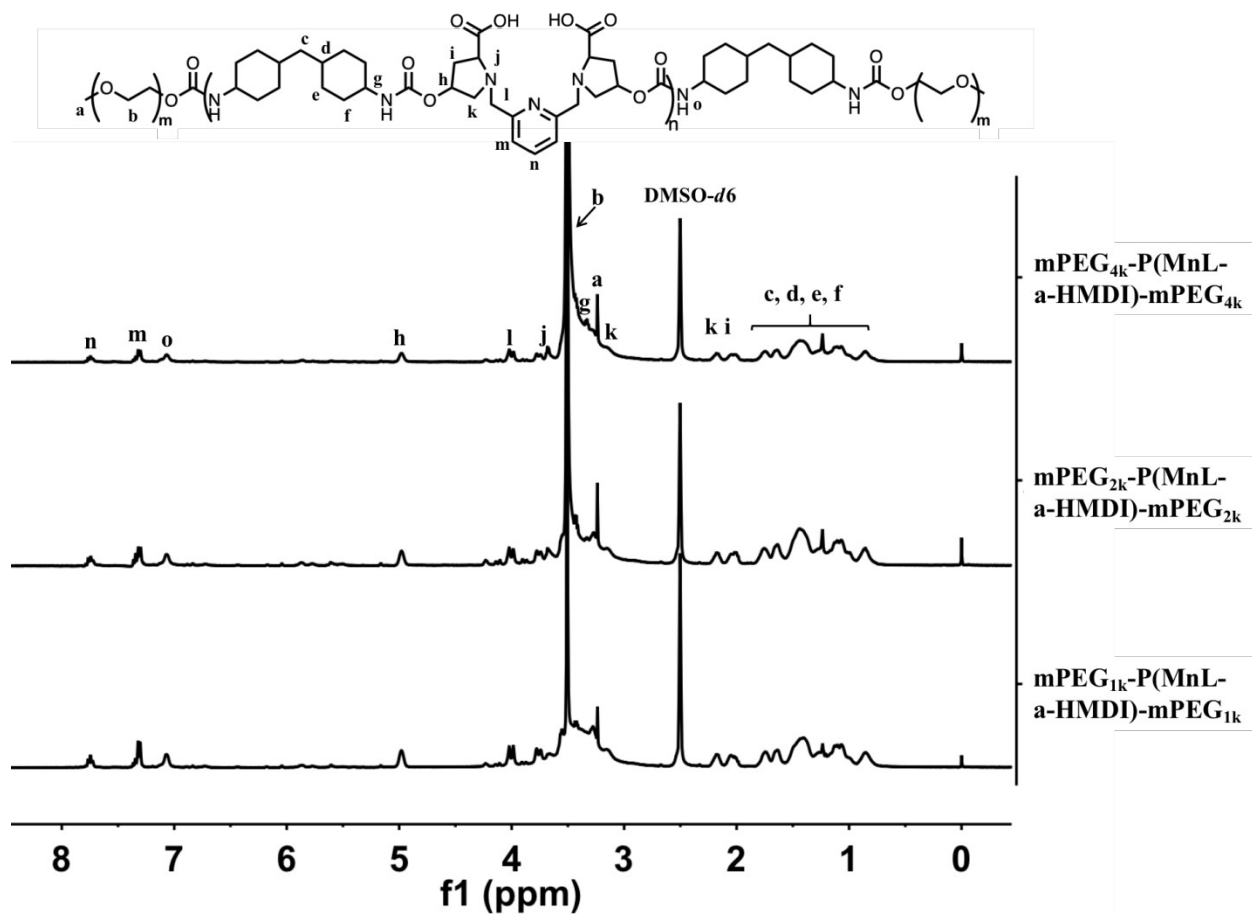

**Figure S4.**  $^1\text{H}$  NMR spectrum of mPEG-P(L-a-HMDI)-mPEG with different molecular weight of mPEG (1 kD, 2 kD and 4 kD).

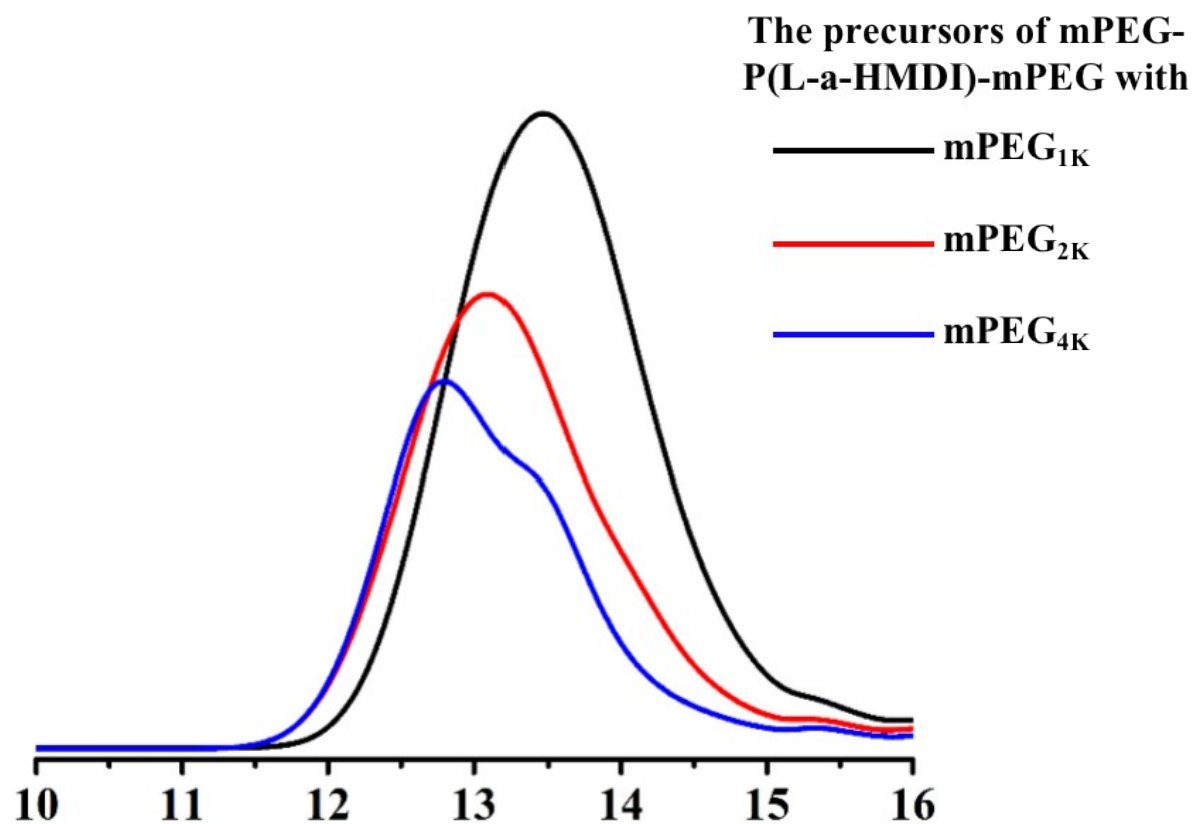

**Figure S5.** Gel permeation chromatography (GPC) of the precursors of mPEG-P(L-a-HMDI)-mPEG with different molecular weight of mPEG (1 kD, 2 kD and 4 kD ).

**Table S1.** The molecular weight of the precursors of mPEG-P(L-a-HMDI)-mPEG with different molecular weight of mPEG (1 kD, 2 kD or 4 kD).

| Sample             | Yield(%) | Mn <sup>a</sup> (kg/mol) | Mn <sup>b</sup> (kg/mol) | Mw <sup>b</sup> (kg/mol) | PDI <sup>b</sup> |
|--------------------|----------|--------------------------|--------------------------|--------------------------|------------------|
| mPEG <sub>1k</sub> | 72       | 6.7                      | 5.9                      | 9.4                      | 1.59             |
| mPEG <sub>2k</sub> | 78       | 8.0                      | 8.1                      | 12.7                     | 1.57             |
| mPEG <sub>4k</sub> | 81       | 10.8                     | 10.7                     | 15.9                     | 1.48             |

<sup>a</sup>Determined by <sup>1</sup>H NMR; <sup>b</sup>Determined by GPC (eluent: DMF, flow rate: 0.4 mL/min).

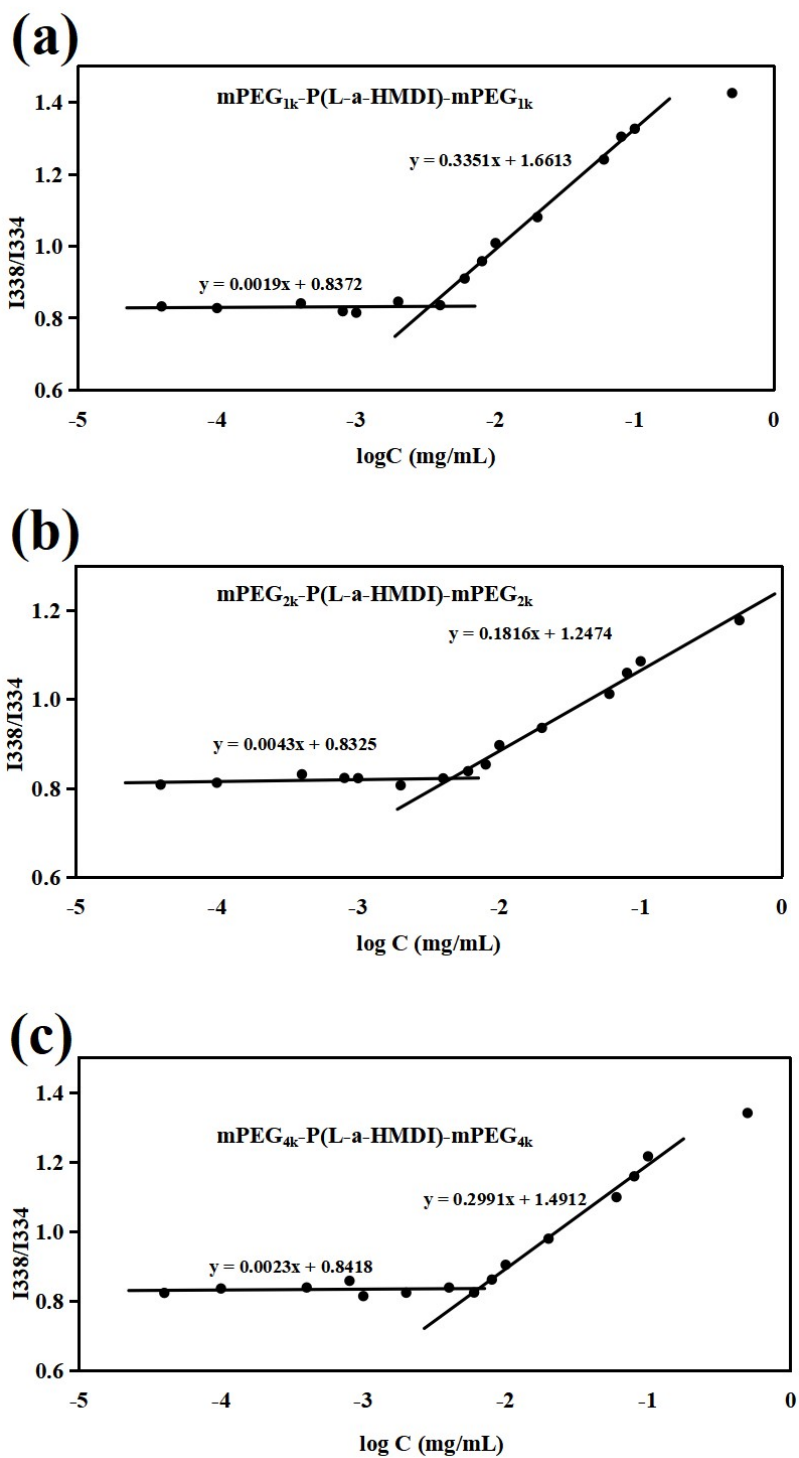

**Figure S6.** CMC of mPEG-P(L-a-HMDI)-mPEG with different molecular weight of mPEG (1 kD, 2 kD and 4 kD).



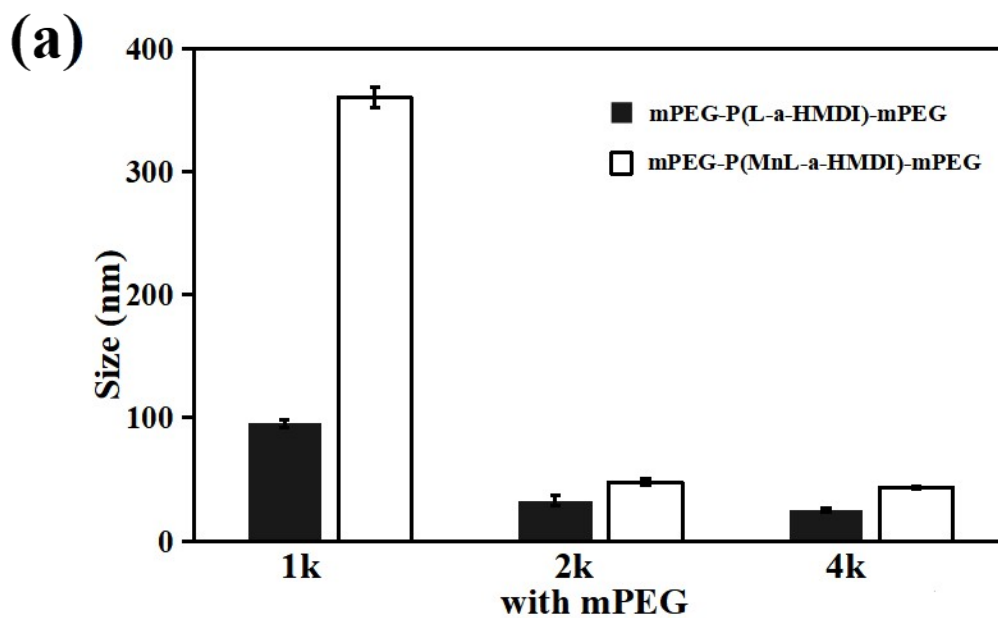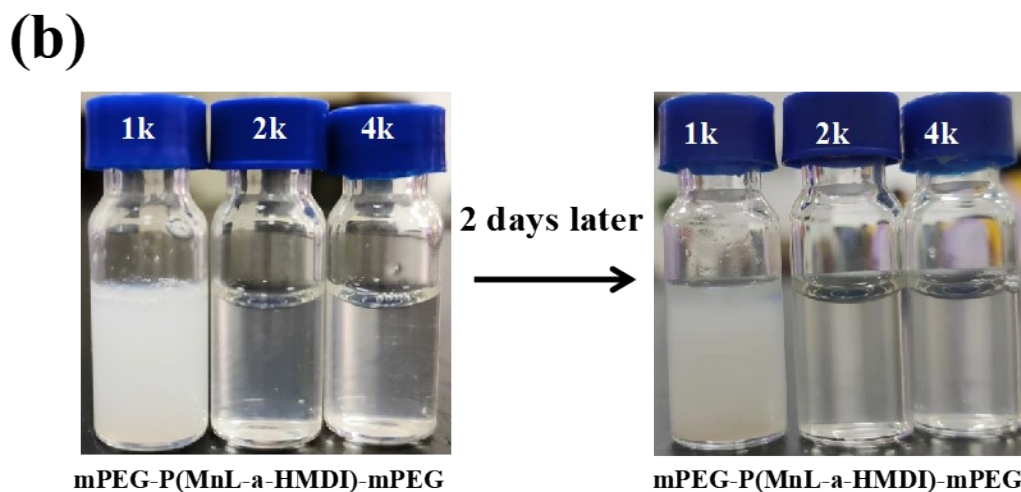

**Figure S7.** (a) Particle size of three mPEG-P(L-a-HMDI)-mPEG polymer micelles and their Mn complexes. (b) After 2 days standing, visible sediments appeared in the bottle with mPEG<sub>1k</sub>-P(MnL-a-HMDI)-mPEG<sub>1k</sub>.

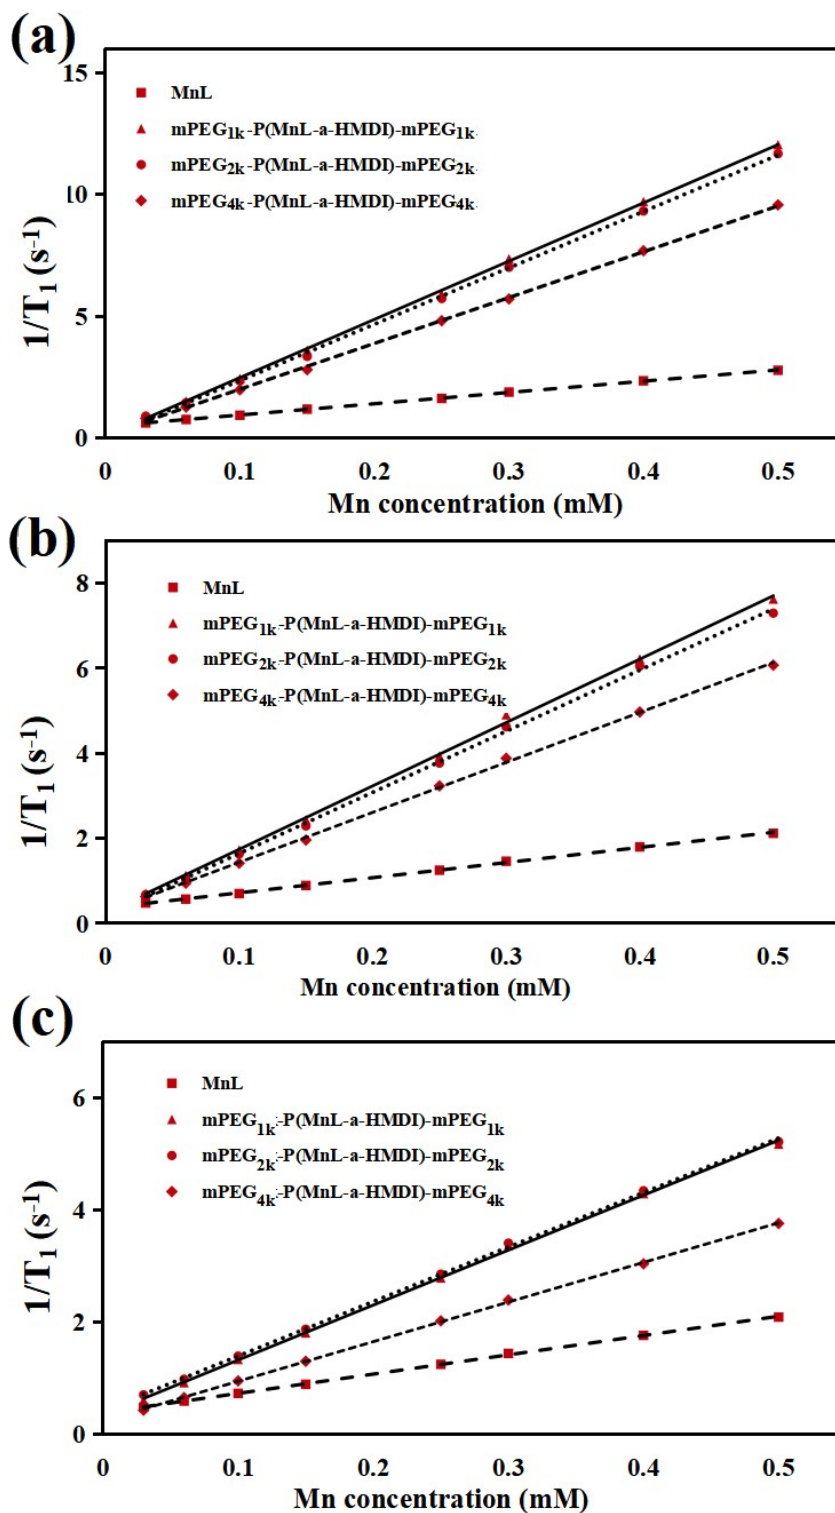

**Figure S8.**  $T_1$  relaxivity over Mn concentration at the magnetic field of (a) 0.5 T, (b) 1.5 T, (c) 3.0 T.

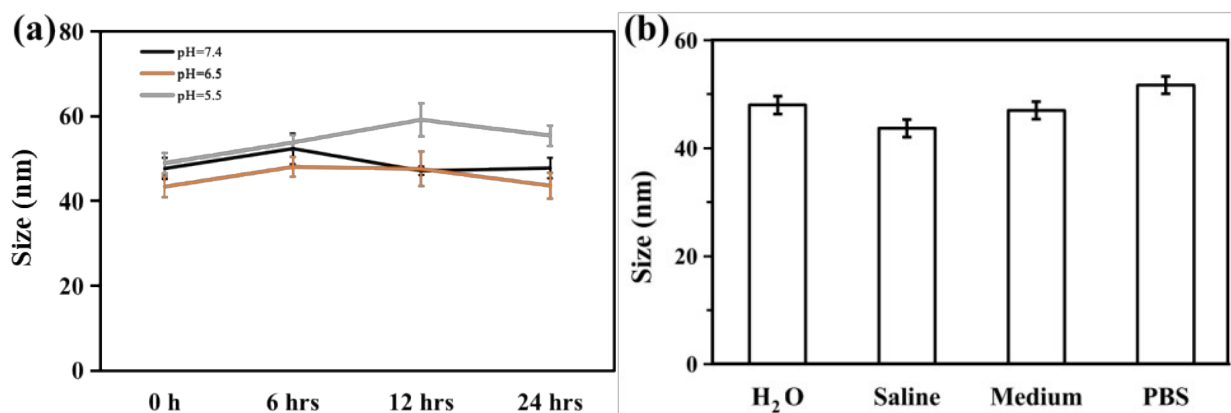

**Figure S9.** The changes in sizes of mPEG<sub>2k</sub>-P(MnL-a-HMDI)-mPEG<sub>2k</sub> complexes in different pH values (a) and several dispersion media (b).

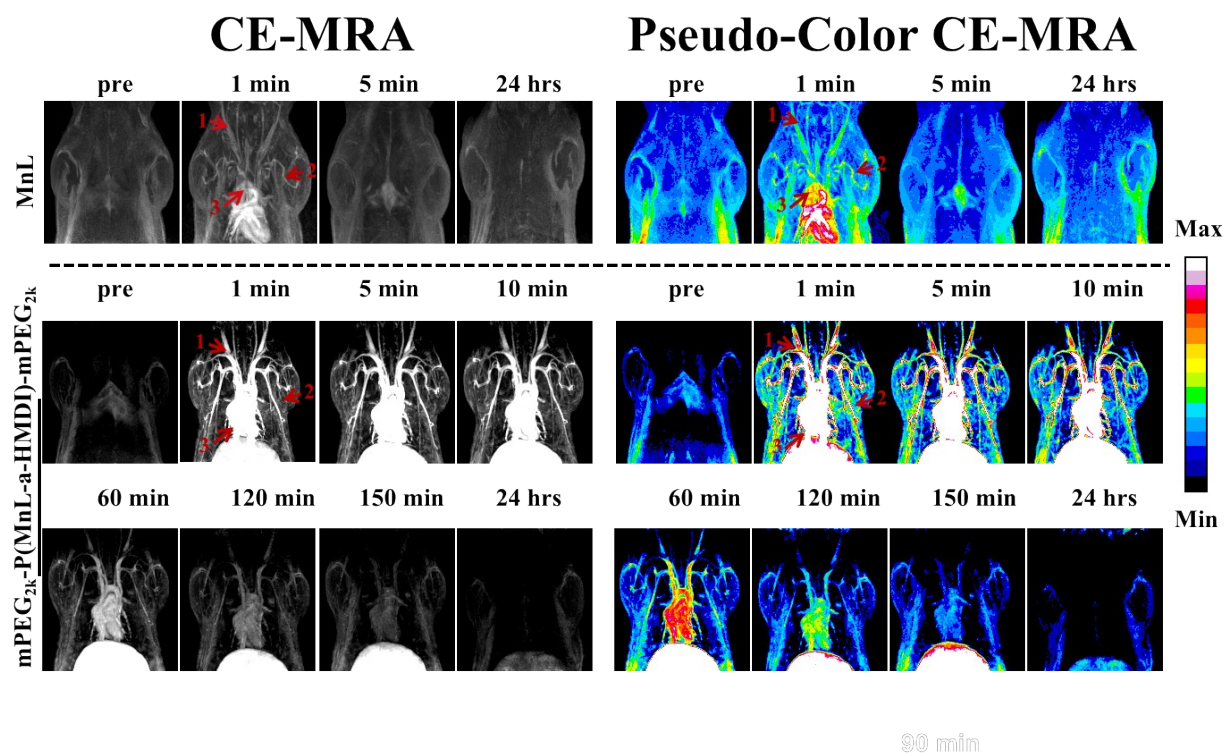

**Figure S10.** Contrast enhanced magnetic resonance angiography (MRA) of SD rats on a clinical 3.0 T MR scanner at low dosage of 0.1 Mn mmol/kg BW.

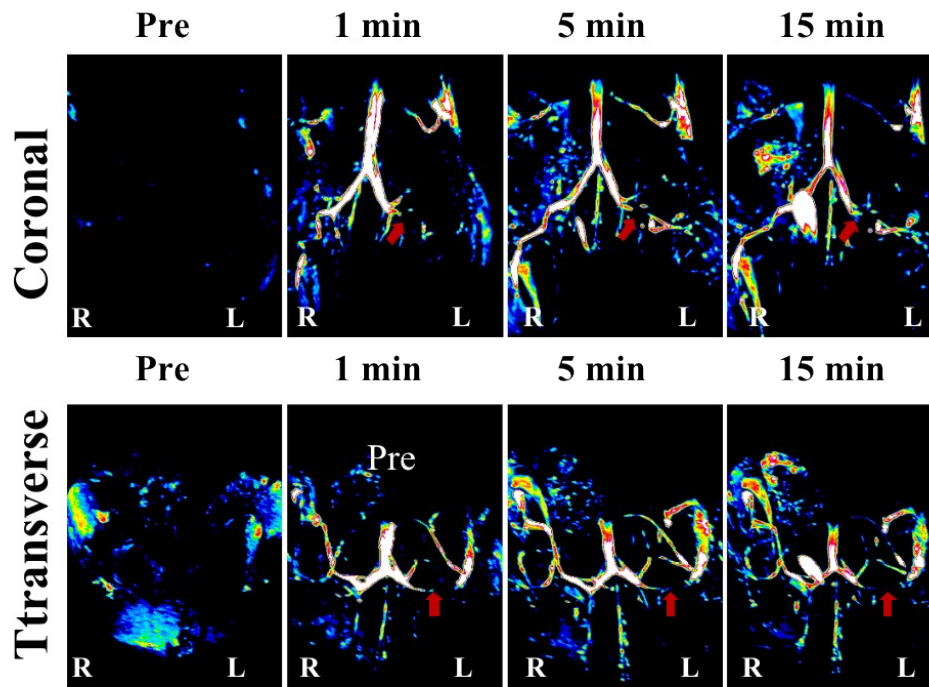

**Figure S11.** The corresponding pseudo-color MRA images of rats with vascular stenosis in the right lower limb before and after intravenous injection of  $m\text{PEG}_{2k}\text{-P}(\text{MnL-a-HMDI})\text{-mPEG}_{2k}$  with 0.1 mmol Mn/kg BW. Among them, the vascular stenosis areas (red arrow) of blood vessels are almost invisible, which are obviously in contrast with the normal blood vessel on the right side and can be clearly detected.
